# Supplementary material for: Green Total Factor Productivity and Its Saving Effect on the Green Factor in China’s Strategic Minerals Industry from 1998–2017
Source: MDPI journal article supplement (doi:10.3390/ijerph192214717), 2022-11-09
Supplement: s1 [file s1]

## Supplementary Materials

### S1. Comparison of robustness test results for GTFP growth and its components<sup>1</sup>

#### S1.1 GTFP growth and its components for the whole strategic minerals industry

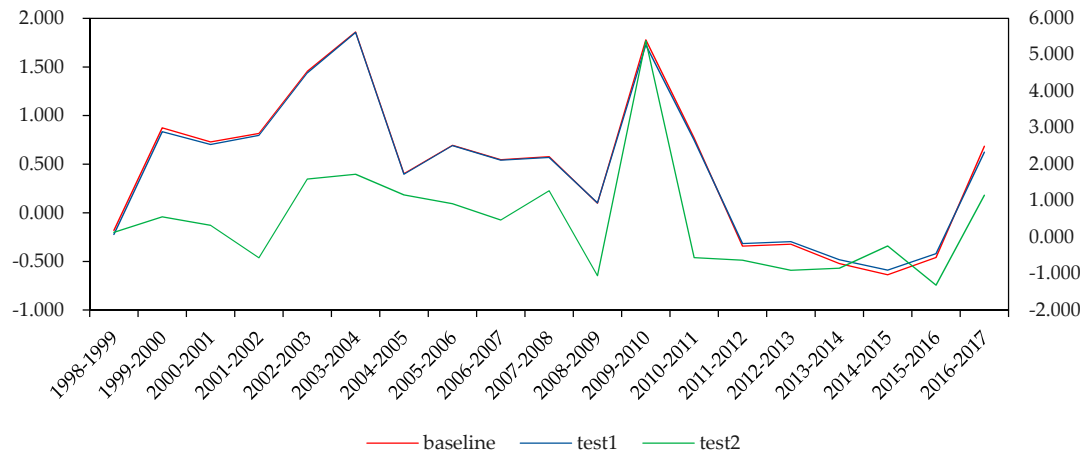

(a)

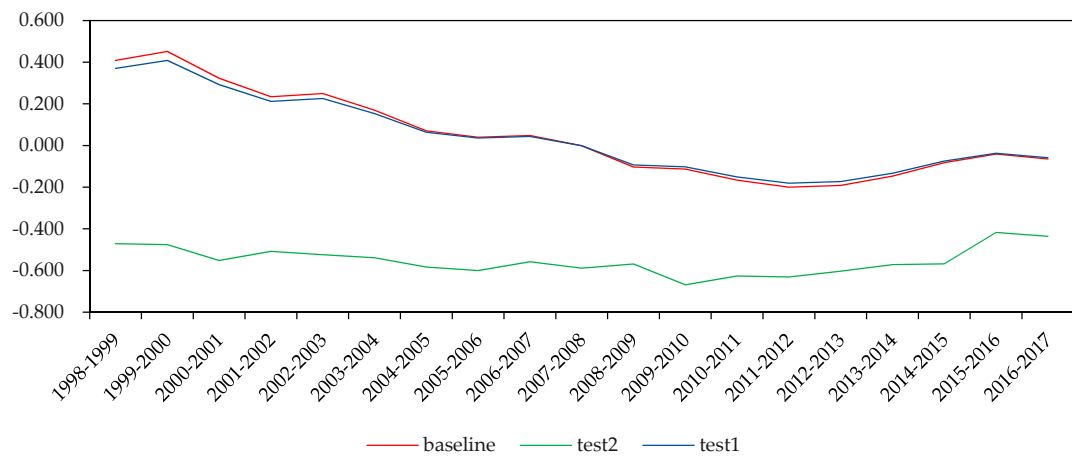

(b)

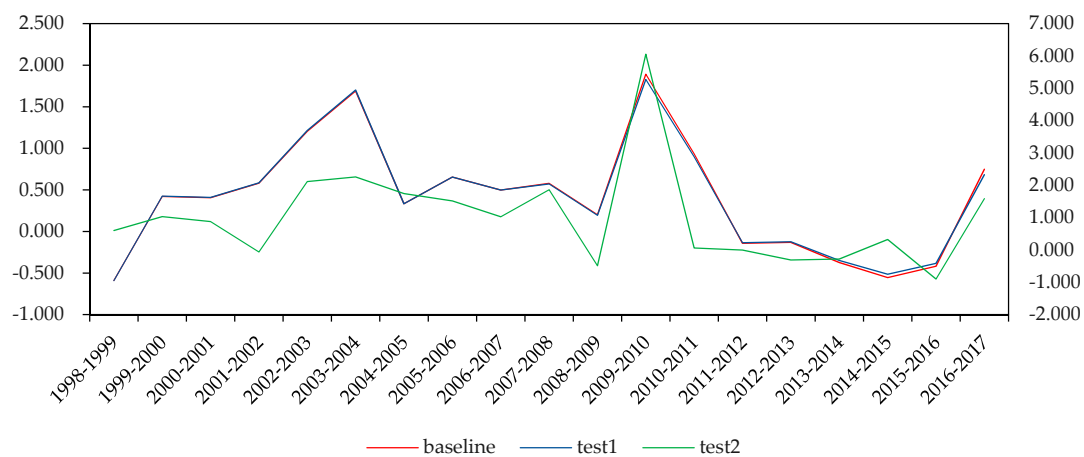

(c)

**Figure S1.** Comparison of robustness test results of GTFP growth and its components for the strategic minerals industry. (a) GTFP growth; (b) TC; (c) SEC.

<sup>1</sup> Note that “baseline” denotes the results reported in the main text; “test1” denotes the robustness test using capital prices for standardization; “test2” denotes the robustness test using gross industrial output as a proxy variable for the total output.

## S1.2 Cumulative GTFP growth by sectors

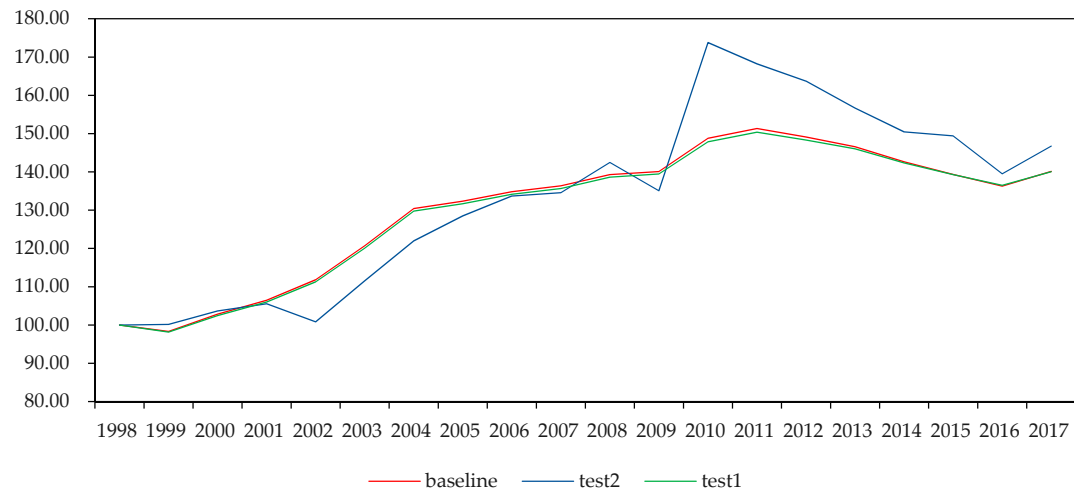

(a)

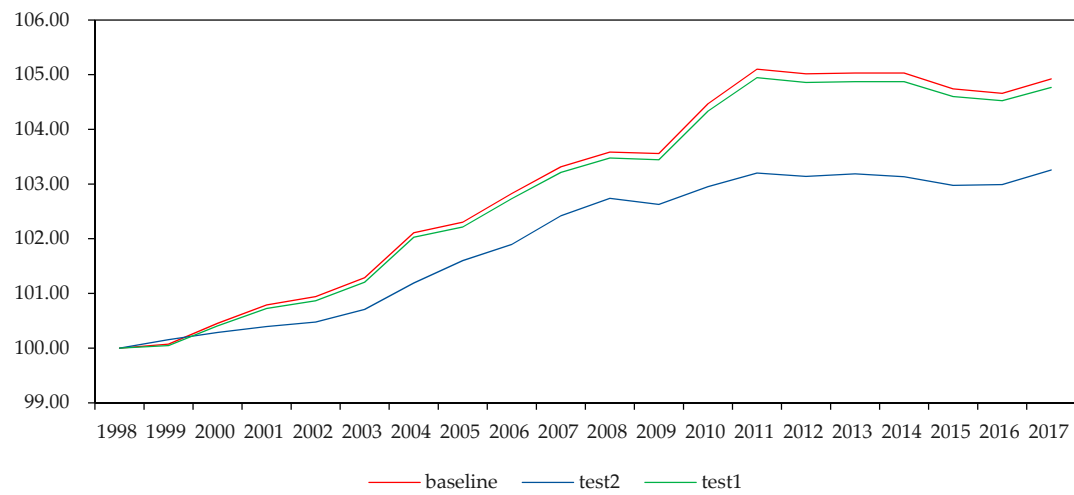

(b)

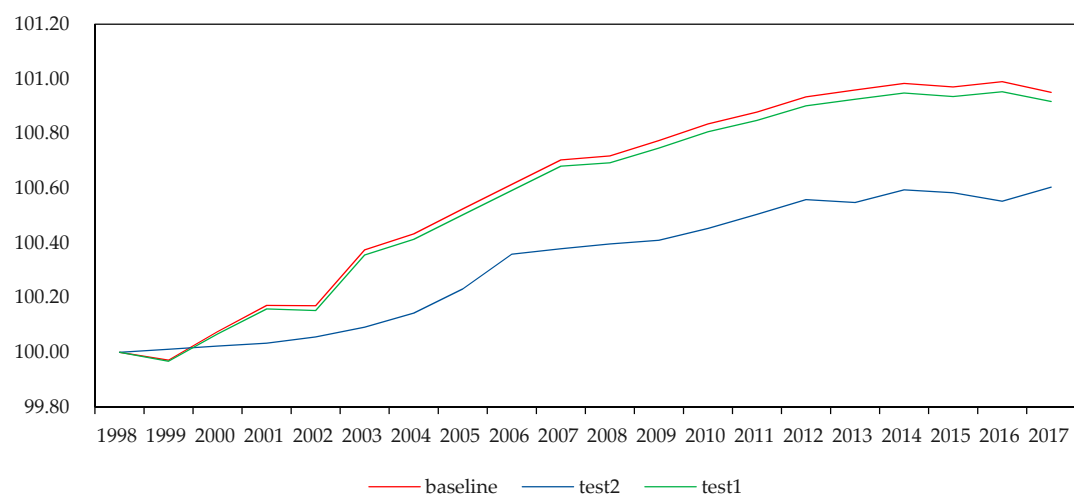

(c)

**Figure S2.** Comparison of cumulative GTFP growth by sectors (1998=100). (a) Energy minerals sector; (b) Metal minerals sector; (c) Nonmetal minerals sector.

### S1.3 Cumulative TC by sectors

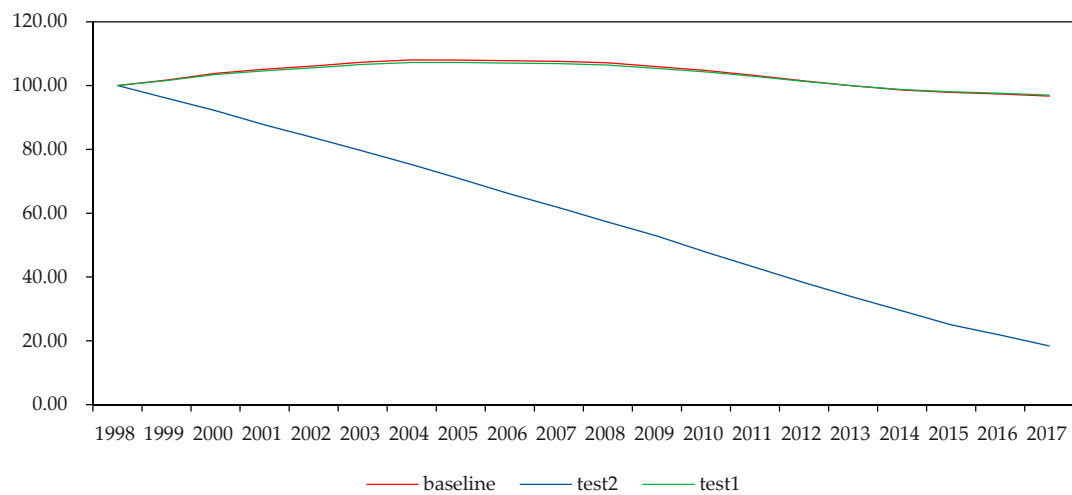

(a)

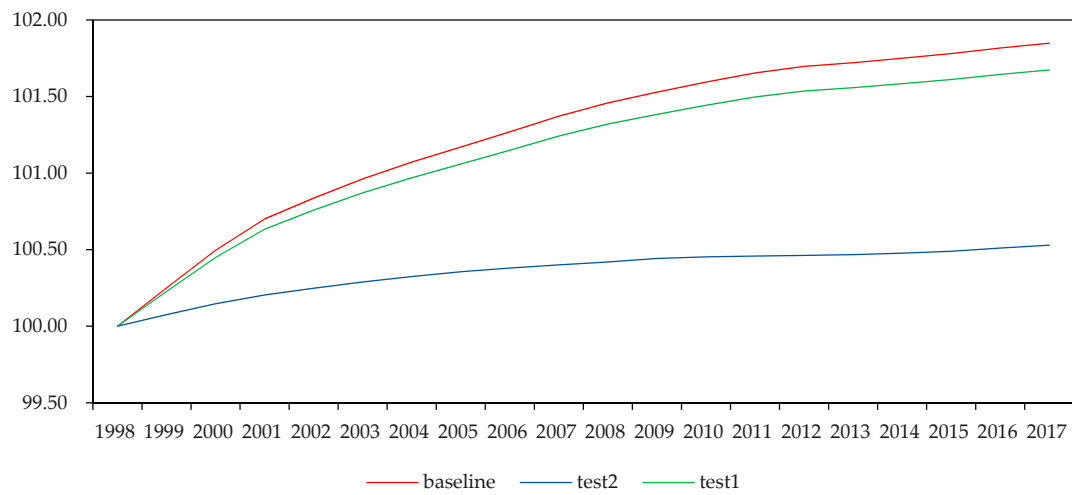

(b)

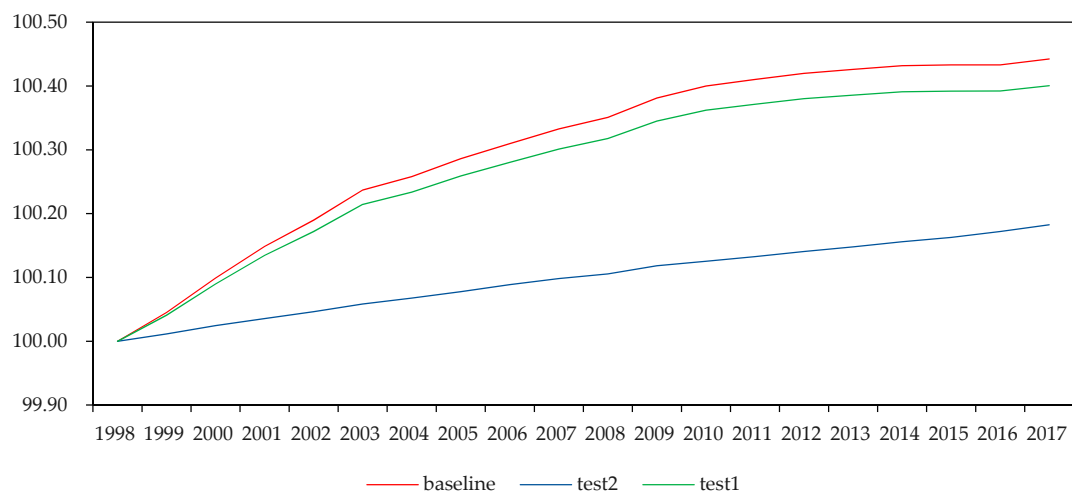

(c)

**Figure S3.** Comparison of cumulative TC by sectors (1998=100). (a) Energy minerals sector; (b) Metal minerals sector; (c) Nonmetal minerals sector.

#### S1.4 Cumulative SEC by sectors

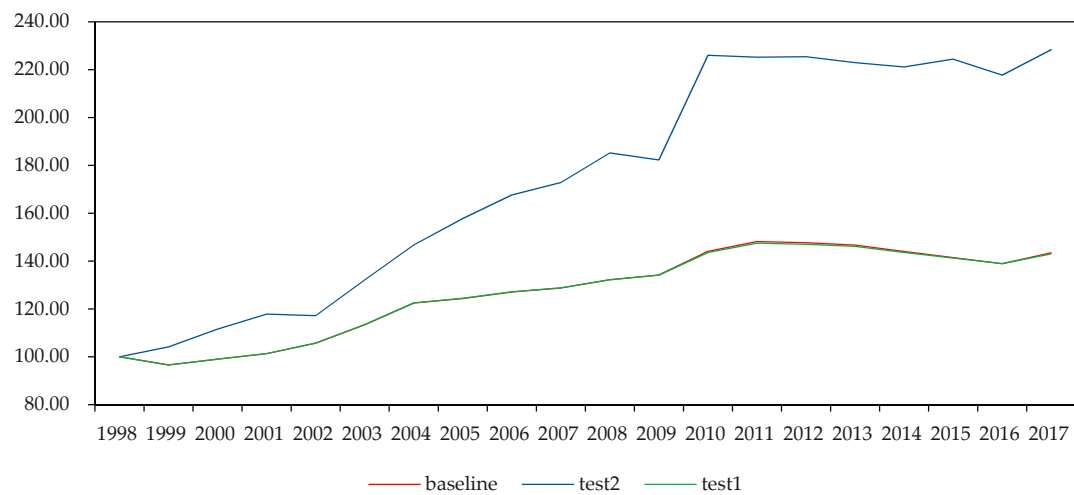

(a)

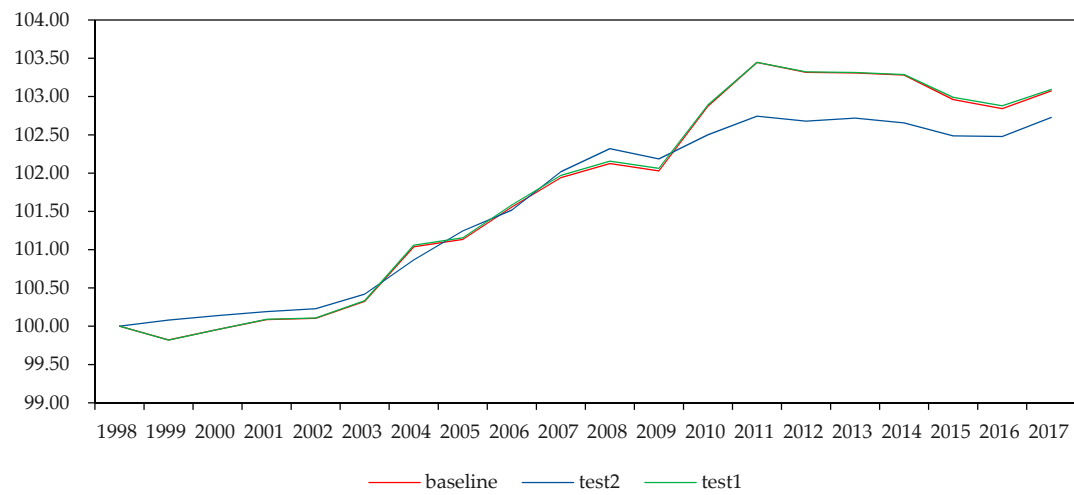

(b)

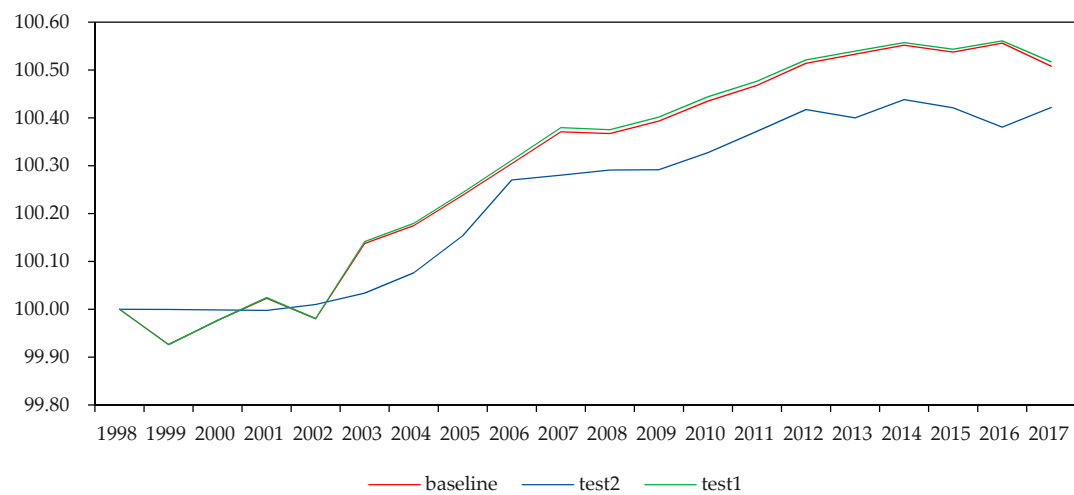

(c)

**Figure S4.** Comparison of cumulative SEC by sectors (1998=100). (a) Energy minerals sector; (b) Metal minerals sector; (c) Nonmetal minerals sector.

## S2. Comparison of robustness test results for green factor bias of technological progress

### S2.1 The whole strategic minerals industry

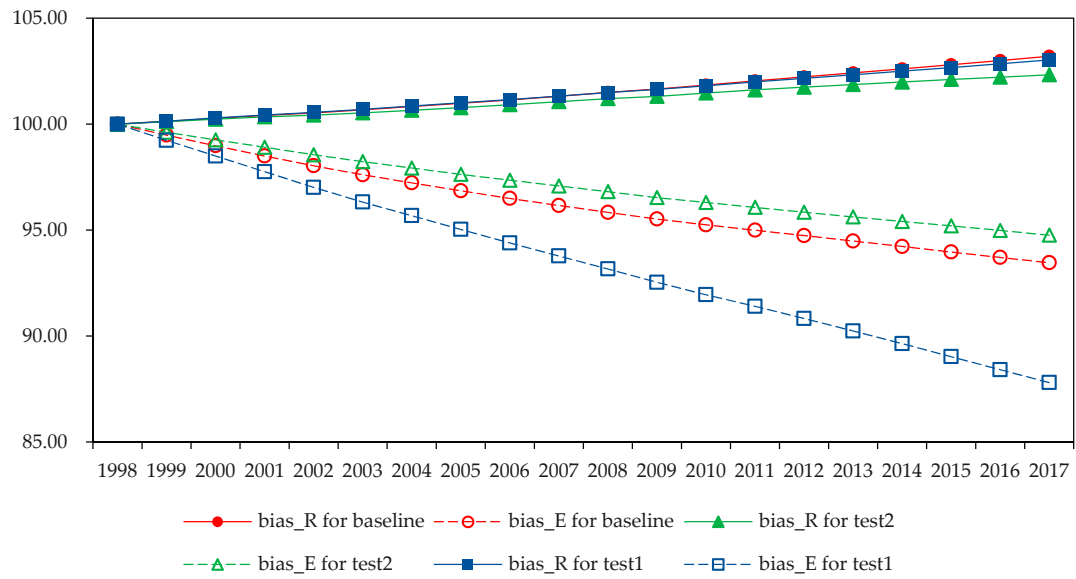

Figure S5. Comparison of robustness test results for green factor biased technological progress in strategic minerals industry.

### S2.2 The energy minerals sector

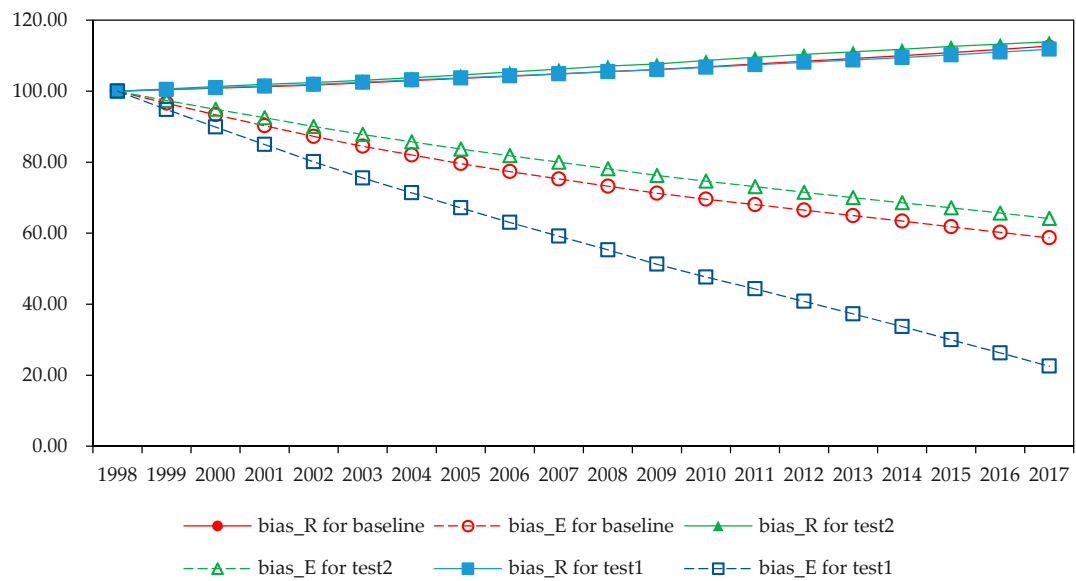

Figure S6. Comparison of robustness test results for green factor biased technological progress in energy minerals sector.

### S2.3 The metal minerals sector

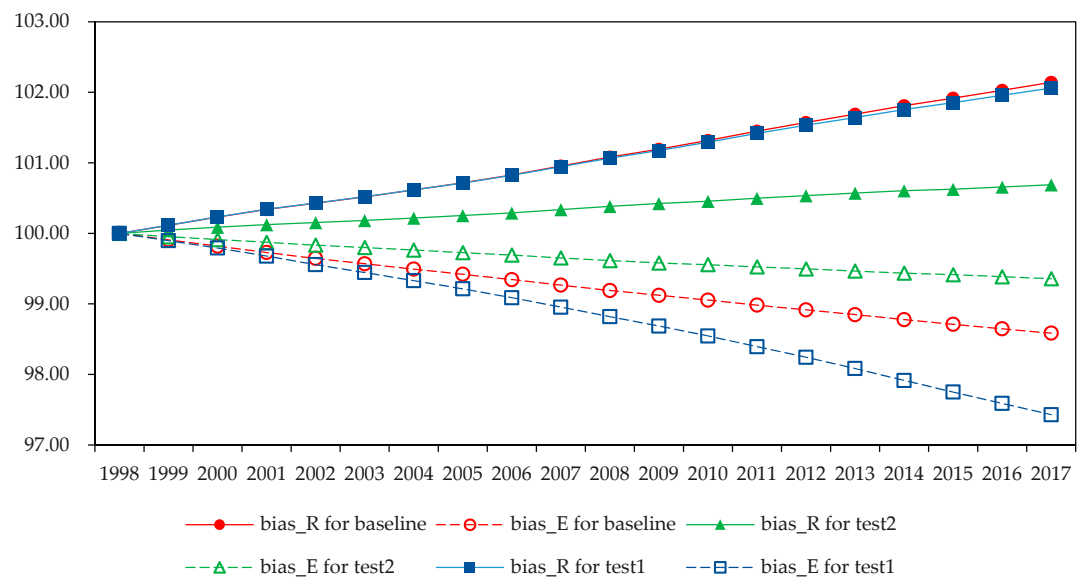

**Figure S7.** Comparison of robustness test results for green factor biased technological progress in metal minerals sector.

### S2.4 The nonmetal minerals sector

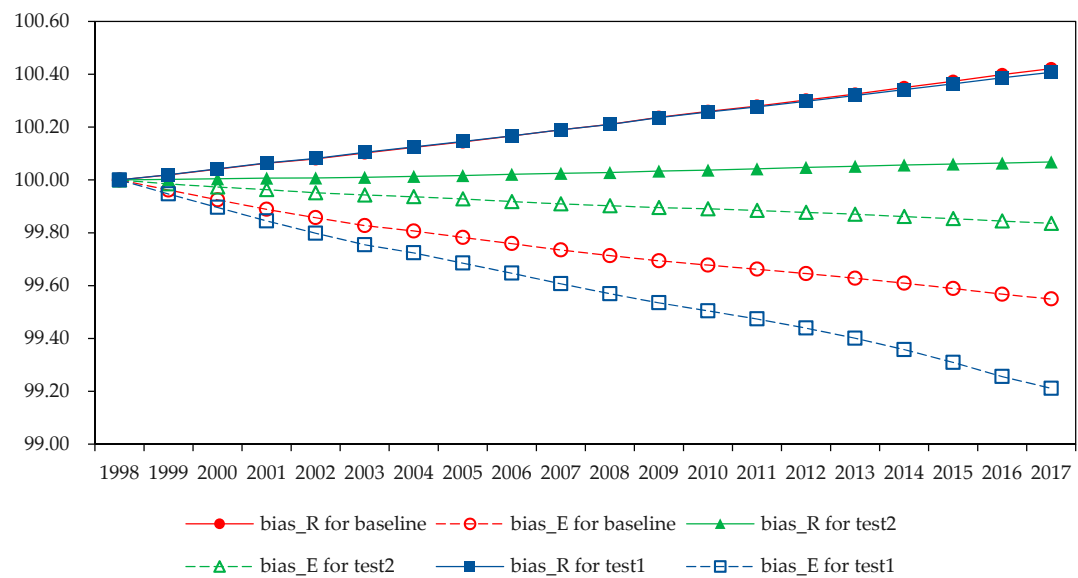

**Figure S8.** Comparison of robustness test results for green factor biased technological progress in nonmetal minerals sector.
